# Supplementary material for: Predictors for Adherence to Treatment Strategies in Elderly HNSCC Patients
Source: MDPI journal article supplement (doi:10.3390/cancers14020423), 2022-01-14
Supplement: s1 [file s1]

## Supplementary Material Tables

**Table S1.** Patient and tumour characteristics of the study population treated with **curative** intent according to adherence/nonadherence to the tumour board recommendation.

| Variable                                 | Total<br>n = 990 | Adherence<br>n = 860 | Nonadherence<br>n = 130 | P value       |
|------------------------------------------|------------------|----------------------|-------------------------|---------------|
| Sex–no. (%)                              |                  |                      |                         | 0.743         |
| Male                                     | 673 (68.0)       | 583 (67.8)           | 90 (69.2)               |               |
| Female                                   | 317 (32.0)       | 277 (32.2)           | 40 (30.8)               |               |
| Age at initial diagnosis of HNSCC, years |                  |                      |                         | 0.731         |
| Median (range)                           | 75 (26)          | 75 (26)              | 74.5 (24)               |               |
| Tobacco exposure–no. (%)                 |                  |                      |                         | <b>0.006</b>  |
| Non-smoker                               | 200 (35.1)       | 184 (37.3)           | 16 (21.1)               |               |
| Current/former smoker                    | 369 (64.9)       | 309 (62.7)           | 60 (78.9)               |               |
| Pack years                               |                  |                      |                         | <b>0.021</b>  |
| Median (range)                           | 50 (197)         | 50 (147)             | 50 (195)                |               |
| Alcohol abuse–no. (%)                    |                  |                      |                         | <b>0.001</b>  |
| No ethanol consumption                   | 397 (70.9)       | 359 (73.4)           | 38 (53.5)               |               |
| Ethanol consumption                      | 163 (29.1)       | 130 (26.6)           | 33 (46.5)               |               |
| Additional cancer diagnoses–no. (%)      |                  |                      |                         | 0.569         |
| Other cancers                            | 334 (33.7)       | 293 (34.1)           | 41 (31.5)               |               |
| None                                     | 656 (66.3)       | 567 (65.9)           | 89 (68.5)               |               |
| Number of additional cancer diagnoses    |                  |                      |                         | 0.798         |
| 0                                        | 656 (66.3)       | 567 (65.9)           | 89 (68.5)               |               |
| 1                                        | 260 (26.3)       | 229 (26.6)           | 31 (23.8)               |               |
| ≥2                                       | 74 (7.5)         | 64 (7.4)             | 10 (7.7)                |               |
| Charlson comorbidity index–no. (%)       |                  |                      |                         | <b>≤0.001</b> |
| ≤5                                       | 681 (68.8)       | 609 (70.8)           | 72 (55.4)               |               |
| ≥6                                       | 309 (31.2)       | 251 (29.2)           | 58 (44.6)               |               |
| Karnofsky performance status–no. (%)     |                  |                      |                         | <b>≤0.001</b> |
| ≤70%                                     | 484 (48.9)       | 387 (45.0)           | 97 (74.6)               |               |
| ≥80%                                     | 506 (51.1)       | 473 (55.0)           | 33 (25.4)               |               |
| Death due to cancer                      |                  |                      |                         | <b>≤0.001</b> |

|                                              |                    |            |            |
|----------------------------------------------|--------------------|------------|------------|
| Survived                                     | 476 (54.0)         | 444 (57.9) | 32 (27.8)  |
| Non-cancer-associated                        | 93 (9.4)           | 86 (11.2)  | 7 (6.1)    |
| cancer-associated                            | 313 (31.6)         | 237 (30.9) | 76 (66.1)  |
| HNSCC characteristics                        |                    |            |            |
| Site of primary tumour–no. (%)               | 0.748 <sup>1</sup> |            |            |
| Oropharynx                                   | 245 (24.7)         | 209 (24.4) | 36 (27.7)  |
| Oral cavity                                  | 409 (41.3)         | 355 (41.3) | 54 (41.5)  |
| Larynx                                       | 203 (20.5)         | 179 (20.8) | 24 (18.5)  |
| Hypopharynx                                  | 79 (8.0)           | 67 (7.8)   | 12 (9.2)   |
| Nasal/paranasal sinuses                      | 39 (3.9)           | 36 (4.2)   | 3 (2.3)    |
| Nasopharynx                                  | 15 (1.5)           | 14 (1.6)   | 1 (0.8)    |
| P16 in Oropharynx-Carcinoma–no. (%)          | 0.517              |            |            |
| Positive                                     | 81 (52.3)          | 67 (51.1)  | 14 (58.3)  |
| Grading–no. (%)                              | 0.002              |            |            |
| G1                                           | 101 (11.2)         | 95 (12.1)  | 6 (5.0)    |
| G2                                           | 583 (64.7)         | 512 (65.5) | 71 (59.7)  |
| G3                                           | 217 (24.1)         | 175 (22.4) | 42 (35.3)  |
| T classification (T)–no. (%)                 | ≤0.001             |            |            |
| T1-2                                         | 559 (56.5)         | 513 (59.7) | 46 (35.4)  |
| T3-4                                         | 431 (43.5)         | 347 (40.3) | 84 (64.6)  |
| N classification–no. (%)                     | ≤0.001             |            |            |
| Positive                                     | 441 (44.5)         | 364 (42.3) | 77 (59.2)  |
| M classification–no. (%)                     | -                  |            |            |
| Positive                                     | -                  | -          | -          |
| UICC stage (8 <sup>th</sup> edition)–no. (%) | ≤0.001             |            |            |
| I-II                                         | 440 (44.4)         | 413 (48.0) | 27 (20.8)  |
| III-IV                                       | 550 (55.6)         | 447 (52.0) | 103 (79.2) |
| Intention of therapy                         | ≤0.001             |            |            |
| Curative                                     | 860 (86.9)         | 860 (100)  | -          |
| Palliative                                   | 48 (4.8)           | -          | 48 (36.9)  |
| Curative, discontinued                       | 82 (8.3)           | -          | 82 (63.1)  |

HNSCC, head and neck squamous cell carcinoma; UICC, Union for International Cancer Control;

<sup>1</sup> The requirements to perform a chi-square test were not fulfilled.

**Table S2.** Cross-table comparing the recommended therapy to the received therapy in patients with a **curative** recommendation.

|                                  |                         | Treatment Received |                |             |                |                            |                | Total          |
|----------------------------------|-------------------------|--------------------|----------------|-------------|----------------|----------------------------|----------------|----------------|
|                                  |                         | BSC                | Pall.<br>R(C)T | ST          | Surgery        | Surgery<br>+ adj.<br>R(C)T | Def.<br>R(C)T  |                |
| Treatment<br>recommenda-<br>tion | Surgery                 | 4<br>(0.4%)        | 1<br>(0.1%)    | 0<br>(0.0%) | 388<br>(39.2%) | 0<br>(0.0%)                | 0<br>(0.0%)    | 393<br>(39.7%) |
|                                  | Surgery +<br>adj. R(C)T | 0<br>(0.0%)        | 1<br>(0.1%)    | 0<br>(0.0%) | 61<br>(6.2%)   | 184<br>(18.6%)             | 0<br>(0.0%)    | 246<br>(24.8%) |
|                                  | Def. R(C)T              | 28<br>(2.8%)       | 13<br>(1.3%)   | 1<br>(0.1%) | 0<br>(0.0%)    | 0<br>(0.0%)                | 309<br>(31.2%) | 351<br>(35.5%) |
| Total                            |                         | 449<br>(45.4%)     | 32<br>(3.2%)   | 1<br>(0.1%) | 15<br>(1.5%)   | 309<br>(31.2%)             | 184<br>(18.6%) | 990<br>(100%)  |

BSC, Best Supportive Care; Pall. R(C)T, palliative radio(chemo)therapy; ST, systemic therapy; Adj. R(C)T, adjuvant radio(chemo)therapy; Def. R(C)T, definitive radio(chemo)therapy.

**Table S3.** Cross-table comparing the therapy recommended by the tumour board to the implementation of the therapy in patients with a **curative** recommendation.

|                             |                         | Nonadherent  |           | Adherent    | Total       |
|-----------------------------|-------------------------|--------------|-----------|-------------|-------------|
|                             |                         | Discontinued | Rejected  | Carried Out |             |
| Treatment<br>recommendation | Surgery                 | 3 (0.3%)     | 5 (0.5%)  | 385 (38.9%) | 393 (39.7%) |
|                             | Surgery + adj.<br>R(C)T | 24 (2.4%)    | 44 (4.4%) | 178 (18.0%) | 246 (24.8%) |
|                             | Def. R(C)T              | 37 (3.7%)    | 17 (1.7%) | 297 (30.0%) | 351 (35.5%) |
| Total                       |                         | 64 (6.5%)    | 66 (6.7%) | 860 (86.9%) | 990 (100%)  |

BSC, Best Supportive Care; Adj. R(C)T, adjuvant radio(chemo)therapy; Def. R(C)T, definitive radio(chemo)therapy.

**Table S4.** Univariate and multivariate analysis of clinicopathologic variables associated with overall survival of patients with a **curative** recommendation.

| Univariate Analysis                  |         |                                     |                         |           |                                     |                         |              |                                     |                         |
|--------------------------------------|---------|-------------------------------------|-------------------------|-----------|-------------------------------------|-------------------------|--------------|-------------------------------------|-------------------------|
| Variable                             | Total   |                                     |                         | Adherence |                                     |                         | Nonadherence |                                     |                         |
|                                      | n = 990 | Mean OS<br>(months/% <sup>1</sup> ) | p<br>Value <sup>2</sup> | n = 860   | Mean OS<br>(months/% <sup>1</sup> ) | P<br>Value <sup>2</sup> | n = 130      | Mean OS<br>(months/% <sup>1</sup> ) | P<br>Value <sup>2</sup> |
| Sex                                  |         |                                     | 0.482                   |           |                                     | 0.564                   |              |                                     | 0.386                   |
| Male                                 | 673     | 71/45.6                             |                         | 583       | 75/49.2                             |                         | 90           | 30/22.2                             |                         |
| Female                               | 317     | 66/47.5                             |                         | 277       | 70/51.0                             |                         | 40           | 39/23.0                             |                         |
| Age at initial diagnosis of<br>HNSCC |         |                                     | 0.001                   |           |                                     | 0.001                   |              |                                     | 0.142                   |
| 70-74 years                          | 459     | 76/50.2                             |                         | 394       | 83/54.6                             |                         | 65           | 36/22.5                             |                         |
| 75-79 years                          | 340     | 62/44.2                             |                         | 306       | 66/46.9                             |                         | 34           | 25/21.5                             |                         |
| 80-84 years                          | 119     | 57/39.0                             |                         | 94        | 59/41.4                             |                         | 25           | 41/29.0                             |                         |
| 85-89 years                          | 51      | 47/43.5                             |                         | 48        | 50/46.4                             |                         | 3            | 5/0.0                               |                         |
| Older than 90<br>years               | 21      | 26/30.7                             |                         | 18        | 30/37.0                             |                         | 3            | 5/0.0                               |                         |
| Tobacco exposure                     |         |                                     | 0.003                   |           |                                     | 0.014                   |              |                                     | 0.771                   |
| Non-smoker                           | 200     | 74/55.5                             |                         | 184       | 78/58.0                             |                         | 16           | 27/31.3                             |                         |
| Current/former<br>smoker             | 369     | 61/40.0                             |                         | 309       | 67/44.0                             |                         | 60           | 30/18.4                             |                         |
| Alcohol abuse                        |         |                                     | ≤0.001                  |           |                                     | ≤0.001                  |              |                                     | 0.049                   |
| No ethanol<br>consumption            | 397     | 47/55.3                             |                         | 359       | 76/58.5                             |                         | 38           | 39/23.4                             |                         |
| Ethanol<br>consumption               | 163     | 72/28.0                             |                         | 130       | 54/32.8                             |                         | 33           | 18/9.7                              |                         |

|                              |        |         |        |         |       |         |
|------------------------------|--------|---------|--------|---------|-------|---------|
| Additional cancer diagnoses  | 0.023  |         | 0.036  |         | 0.059 |         |
| Other cancers                | 334    | 75/41.0 | 293    | 63/44.6 | 41    | 22/15.3 |
| None                         | 656    | 58/49.0 | 567    | 83/52.6 | 89    | 40/25.4 |
| Charlson comorbidity index   | ≤0.001 |         | ≤0.001 |         | 0.018 |         |
| ≤5                           | 681    | 79/52.4 | 609    | 84/55.0 | 72    | 46/30.3 |
| ≥6                           | 309    | 45/32.2 | 251    | 51/36.7 | 58    | 19/13.1 |
| Karnofsky performance status | ≤0.001 |         | ≤0.001 |         | 0.025 |         |
| ≤70%                         | 484    | 43/27.4 | 387    | 47/30.0 | 97    | 27/16.6 |
| ≥80%                         | 506    | 92/63.9 | 473    | 95/65.7 | 33    | 55/37.3 |
| Site of primary tumour       | ≤0.001 |         | ≤0.001 |         | 0.749 |         |
| Oropharynx                   | 245    | 75/49.8 | 209    | 82/54.6 | 36    | 29/16.8 |
| Oral cavity                  | 409    | 60/46.7 | 355    | 63/49.8 | 54    | 37/27.1 |
| Larynx                       | 203    | 88/52.7 | 179    | 94/57.7 | 24    | 31/19.0 |
| Hypopharynx                  | 79     | 35/18.4 | 67     | 29/17.8 | 12    | 26/16.7 |
| Paranasal sinus              | 39     | 60/48.1 | 36     | 64/48.9 | 3     | 26/0.0  |
| Nasopharynx                  | 15     | 32/29.2 | 14     | 34/31.3 | 1     | 6/0.0   |
| P16 in Oropharynx-Carcinoma  | 0.297  |         | 0.270  |         | 0.475 |         |
| Positive                     | 81     | 79/54.6 | 67     | 87/60.9 | 14    | 26/0.0  |
| Negative                     | 74     | 62/46.4 | 64     | 65/51.0 | 10    | 22/15.0 |
| Grading                      | 0.157  |         | 0.662  |         | 0.335 |         |
| G1                           | 101    | 66/55.1 | 95     | 67/56.0 | 6     | 37/50.0 |
| G2                           | 583    | 71/46.4 | 512    | 76/49.6 | 71    | 32/23.4 |
| G3                           | 217    | 62/42.7 | 175    | 69/48.7 | 42    | 27/15.7 |
| T classification             | ≤0.001 |         | ≤0.001 |         | 0.101 |         |
| T1-2                         | 559    | 89/57.0 | 513    | 92/59.3 | 46    | 43/32.6 |
| T3-4                         | 431    | 48/32.3 | 347    | 52/36.0 | 84    | 31/16.7 |
| N classification             | ≤0.001 |         | ≤0.001 |         | 0.028 |         |

|                                          |                         |              |         |              |         |              |         |
|------------------------------------------|-------------------------|--------------|---------|--------------|---------|--------------|---------|
|                                          | Positive                | 441          | 55/34.6 | 364          | 61/38.6 | 77           | 25/15.1 |
|                                          | Negative                | 549          | 80/55.5 | 496          | 86/58.0 | 53           | 50/32.4 |
| UICC stage (8 <sup>th</sup> edition)     |                         | $\leq 0.001$ |         | $\leq 0.001$ |         | 0.519        |         |
|                                          | I-II                    | 440          | 95/62.8 | 402          | 97/64.4 | 27           | 36/32.0 |
|                                          | III-IV                  | 550          | 51/33.4 | 416          | 53/35.7 | 103          | 33/19.7 |
| Treatment received                       |                         | $\leq 0.001$ |         | $\leq 0.001$ |         | $\leq 0.001$ |         |
|                                          | Palliative/ BSC         | 32           | 6/3.3   | -            | -       | 32           | 6/3.3   |
|                                          | Pall. R(C)T             | 15           | 12/13.3 | -            | -       | 15           | 12/13.3 |
|                                          | Surgery                 | 449          | 91/62.9 | 385          | 99/66.9 | 64           | 59/38.8 |
|                                          | Surgery + adj.<br>R(C)T | 184          | 65/40.6 | 178          | 66/40.7 | 6            | 31/16.7 |
|                                          | Def. R(C)T              | 309          | 46/32.1 | 297          | 48/33.4 | 12           | 3/0.0   |
|                                          | ST                      | 1            | 5/0.0   |              |         | 1            | 5/0.0   |
| Treatment recommendation                 |                         | $\leq 0.001$ |         | $\leq 0.001$ |         | $\leq 0.001$ |         |
|                                          | Surgery                 | 393          | 97/65.5 | 385          | 99/66.9 | 8            | 5/0.0   |
|                                          | Surgery + adj.<br>R(C)T | 246          | 64/40.4 | 178          | 66/40.7 | 68           | 58/39.5 |
|                                          | Def. R(C)T              | 351          | 42/28.9 | 297          | 48/33.4 | 54           | 7/5.7   |
| Adherence to treatment<br>recommendation |                         | $\leq 0.001$ |         | -            |         | -            |         |
|                                          | Adherent                | 860          | 76/49.8 | -            | -       | -            | -       |
|                                          | Nonadherent             | 130          | 35/22.3 | -            | -       | -            | -       |
| Implementation of therapy                |                         | $\leq 0.001$ |         | -            |         | $\leq 0.001$ |         |
|                                          | Discontinued            | 64           | 15/10.2 | -            | -       | 64           | 15/10.2 |
|                                          | Rejected                | 66           | 52/33.7 | -            | -       | 66           | 52/33.7 |
|                                          | Carried out             | 860          | 76/49.8 | 860          | 76/49.8 | -            | -       |
| Intention of therapy                     |                         | $\leq 0.001$ |         |              |         | $\leq 0.001$ |         |

|  |                           |     |         |     |         |    |         |
|--|---------------------------|-----|---------|-----|---------|----|---------|
|  | Curative                  | 860 | 76/49.8 | 860 | 76/49.8 | -  | -       |
|  | Palliative                | 48  | 8/6.4   | -   | -       | 48 | 8/6.4   |
|  | Curative,<br>discontinued | 82  | 49/32.7 | -   | -       | 82 | 49/32.7 |

### Multivariate Cox Regression Analysis

| Variable                              | n = 990 | HR    | 95%CI       | P value       |
|---------------------------------------|---------|-------|-------------|---------------|
| Age of diagnosis                      |         | 1.382 | 1.068-1.778 | <u>0.014</u>  |
| ≤75                                   | 544     |       |             |               |
| ≥76                                   | 446     |       |             |               |
| Tobacco exposure                      |         | 1.327 | 1.001-1.759 | <u>0.049</u>  |
| Non-smoker                            | 200     |       |             |               |
| Current/former smoker                 | 369     |       |             |               |
| Charlson comorbidity index            |         | 1.423 | 1.113-1.819 | <u>0.005</u>  |
| ≤5                                    | 681     |       |             |               |
| ≥6                                    | 309     |       |             |               |
| Karnofsky performance status          |         | 0.572 | 0.444-0.738 | <u>≤0.001</u> |
| ≤70%                                  | 484     |       |             |               |
| ≥80%                                  | 506     |       |             |               |
| UICC stage (8 <sup>th</sup> edition)  |         | 1.897 | 1.481-2.429 | <u>≤0.001</u> |
| I-II                                  | 440     |       |             |               |
| III-IV                                | 550     |       |             |               |
| Adherence to treatment recommendation |         | 1.871 | 1.378-2.541 | <u>≤0.001</u> |
| Adherent                              | 860     |       |             |               |
| Nonadherent                           | 130     |       |             |               |

---

OS, overall survival; HNSCC, head and neck squamous cell carcinoma; UICC, Union for International Cancer Control; BSC, Best Supportive Care; Pall. R(C)T, palliative radio(chemo)therapy; ST, systemic therapy; Adj. R(C)T, adjuvant radio(chemo)therapy; Def. R(C)T, definitive radio(chemo)therapy. <sup>1</sup>Proportion of patients alive after a follow-up period of 60 months. <sup>2</sup>The *p*-values for the univariate analysis were determined using the log-rank test.
